# Supplementary material
Source: PubMed Central journal article supplement (PMC7108872)

## Source Data - Extended Data Figure 1c

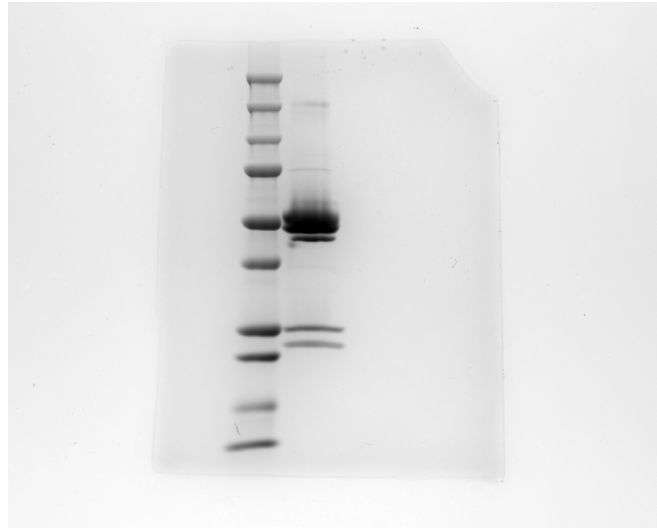

## Source Data - Extended Data Figure 1d

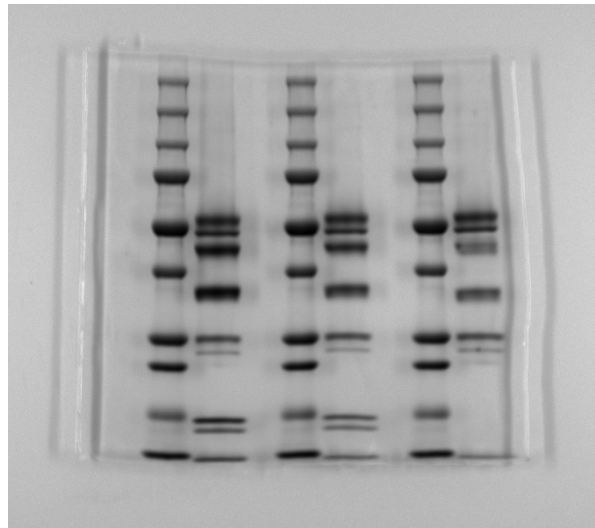

Supplement: NIHMS1541120-supplement-Source_Data.pdf [file NIHMS1541120-supplement-Source_Data.pdf]
